# Supplementary material for: Guanylate-binding protein 2 regulates Drp1-mediated mitochondrial fission to suppress breast cancer cell invasion
Source: PubMed Central journal article supplement (PMC5680924; doi:10.1038/cddis.2017.559), 2017-10-26

Supplementary fig.-2

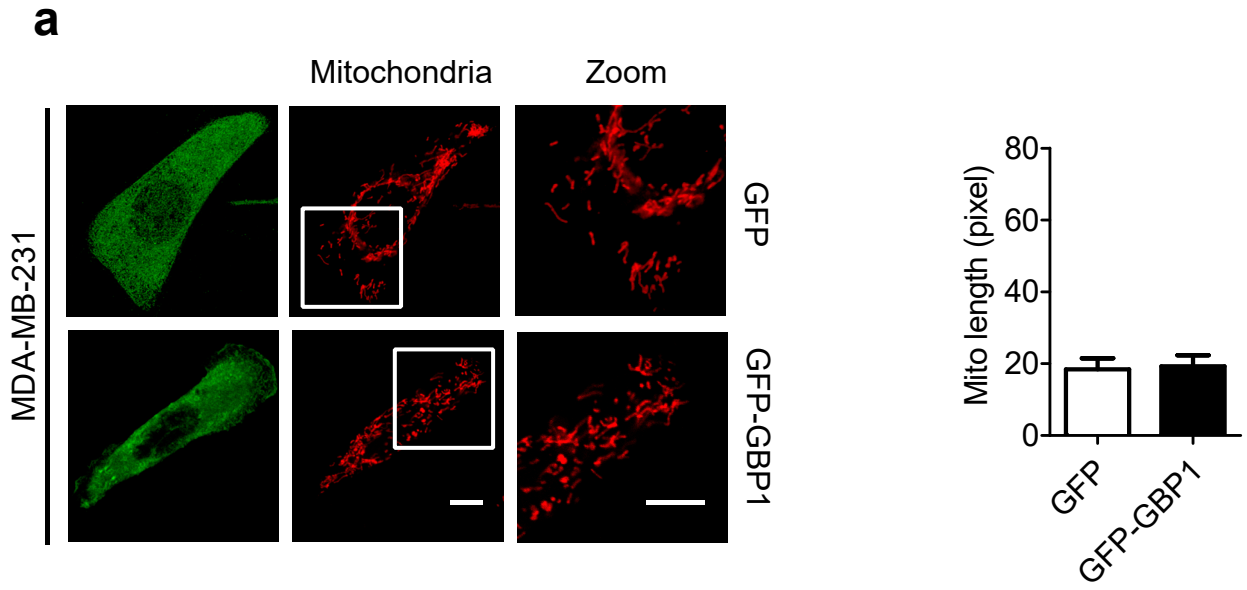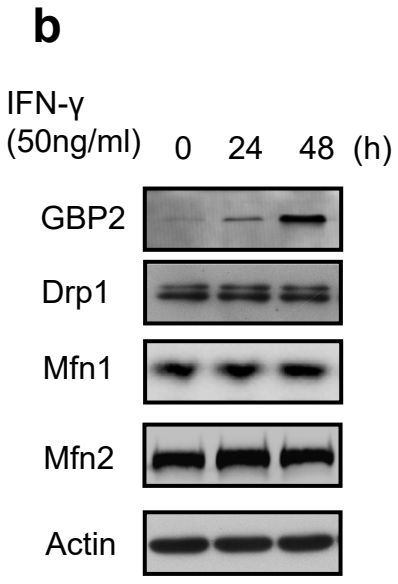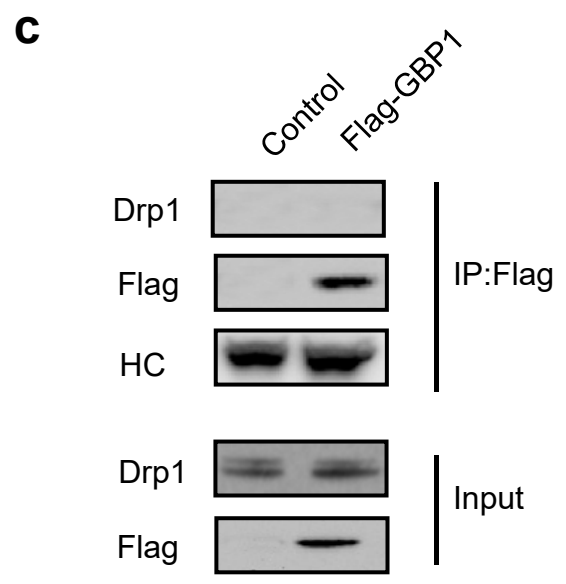

Supplement: cddis2017559x2.pdf [file cddis2017559x2.pdf]
