# Supplementary material for: Guanylate-binding protein 2 regulates Drp1-mediated mitochondrial fission to suppress breast cancer cell invasion
Source: PubMed Central journal article supplement (PMC5680924; doi:10.1038/cddis.2017.559), 2017-10-26

# Supplementary fig.-3

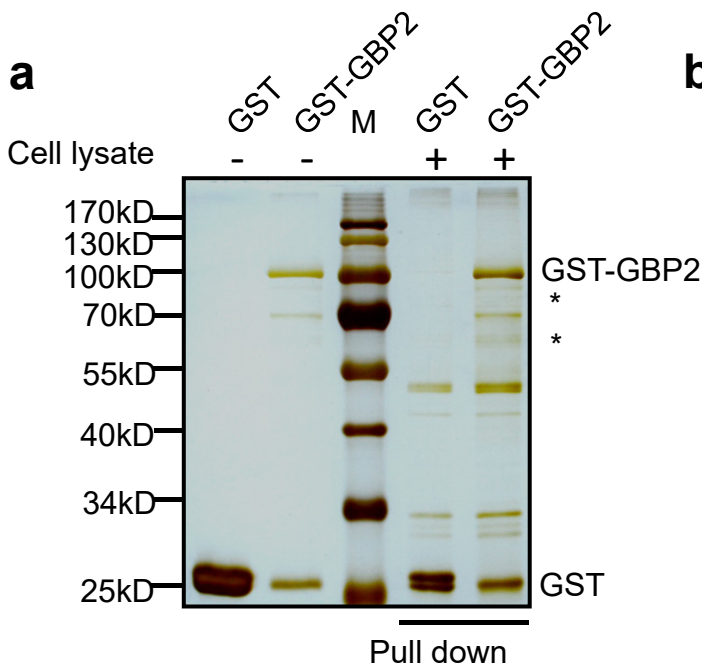

**b** Potential binding proteins of GBP-2 analyzed by MALDI-TOF mass spectrometry

| Gene name | Protein name                               |
|-----------|--------------------------------------------|
| CTTN      | Isoform 3 of Src substrate cortactin       |
| MX2       | Interferon-induced GTP-binding protein Mx2 |
| DRP1      | Dynamin-related protein 1                  |

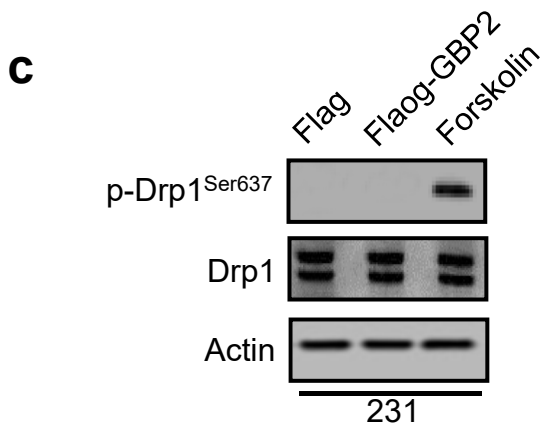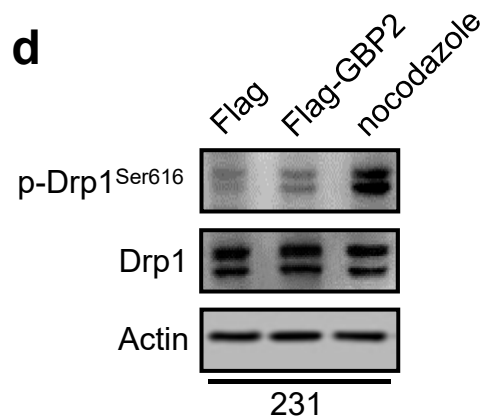

Supplement: cddis2017559x3.pdf [file cddis2017559x3.pdf]
